# Supplementary material for: Construction and Analysis of miRNA Editing Developmental Atlas in Adipose Tissue of Ningxiang Pigs
Source: Preprints.org preprint supplement (doi:10.20944/preprints202403.0370.v1), 2024-03-07
Supplement: Supplementary file 1 [file supplementary]

## Sheet: Sheet1
Query_id	Subject_id	%_identity	alignment_length	mismatches	gap_openings	q.start	q.end	s.start	s.end	e-value	bit_score
13_181303226_+_AG::13:181303200-181303251(+)	21_16539854_+_AG::21:16539828-16539879(+)	100	37	0	0	15	51	1	37	4.91e-15	69.4
13_181303233_+_AG::13:181303207-181303258(+)	21_16539854_+_AG::21:16539828-16539879(+)	100	43	0	0	8	50	1	43	2.27e-18	80.5
3_43468513_+_AG::3:43468487-43468538(+)	9_94178843_+_AG::9:94178817-94178868(+)	100	51	0	0	1	51	1	51	8.1e-23	95.3
3_43468520_+_AG::3:43468494-43468545(+)	9_94178843_+_AG::9:94178817-94178868(+)	100	44	0	0	1	44	8	51	6.31e-19	82.4
13_34406214_-_AG::13:34406188-34406239(-)	3_52268351_-_AG::3:52268325-52268376(-)	100	47	0	0	5	51	1	47	1.36e-20	87.9
13_34406207_-_AG::13:34406181-34406232(-)	3_52268348_-_AG::3:52268322-52268373(-)	100	51	0	0	1	51	1	51	8.1e-23	95.3
13_34406210_-_AG::13:34406184-34406235(-)	3_52268351_-_AG::3:52268325-52268376(-)	100	51	0	0	1	51	1	51	8.1e-23	95.3
9_49157972_-_AG::9:49157946-49157997(-)	11_122152299_-_AG::11:122152273-122152324(-)	95.652	46	2	0	1	46	5	50	1.06e-16	75
9_49157973_-_AG::9:49157947-49157998(-)	11_122152299_-_AG::11:122152273-122152324(-)	95.745	47	2	0	1	47	4	50	2.93e-17	76.8
1_162329837_-_AG::1:162329811-162329862(-)	18_58451091_+_AG::18:58451065-58451116(+)	100	42	0	0	1	42	7	48	8.16e-18	78.7
1_162329843_-_AG::1:162329817-162329868(-)	18_58451091_+_AG::18:58451065-58451116(+)	95.833	48	2	0	1	48	1	48	8.16e-18	78.7
1_162329835_-_AG::1:162329809-162329860(-)	18_58451091_+_AG::18:58451065-58451116(+)	100	40	0	0	1	40	9	48	1.06e-16	75
1_162329834_-_AG::1:162329808-162329859(-)	18_58451091_+_AG::18:58451065-58451116(+)	100	39	0	0	1	39	10	48	3.8e-16	73.1
AEMK02000682.1_1108743_-_AG::AEMK02000682.1:1108717-1108768(-)	9_136670615_+_AG::9:136670589-136670640(+)	100	34	0	0	1	34	18	51	2.28e-13	63.9
2_150580154_+_AG::2:150580128-150580179(+)	5_149430658_+_AG::5:149430632-149430683(+)	100	35	0	0	1	35	17	51	6.35e-14	65.8
13_100083195_+_AG::13:100083169-100083220(+)	3_160404599_+_AG::3:160404573-160404624(+)	100	39	0	0	1	39	13	51	3.8e-16	73.1
13_100083203_+_AG::13:100083177-100083228(+)	3_160404599_+_AG::3:160404573-160404624(+)	100	31	0	0	1	31	21	51	1.06e-11	58.4
6_141943345_+_AG::6:141943319-141943370(+)	1_71067708_-_AG::1:71067682-71067733(-)	97.619	42	1	0	1	42	10	51	3.8e-16	73.1
13_31655540_-_AG::13:31655514-31655565(-)	3_49020700_-_AG::3:49020674-49020725(-)	100	30	0	0	1	30	22	51	3.82e-11	56.5
13_31655549_-_AG::13:31655523-31655574(-)	3_49020700_-_AG::3:49020674-49020725(-)	97.436	39	1	0	1	39	13	51	1.77e-14	67.6
13_31655553_-_AG::13:31655527-31655578(-)	3_49020700_-_AG::3:49020674-49020725(-)	97.436	39	1	0	5	43	13	51	1.77e-14	67.6
13_31655541_-_AG::13:31655515-31655566(-)	3_49020700_-_AG::3:49020674-49020725(-)	100	31	0	0	1	31	21	51	1.06e-11	58.4
13_31655543_-_AG::13:31655517-31655568(-)	3_49020700_-_AG::3:49020674-49020725(-)	100	33	0	0	1	33	19	51	8.22e-13	62.1
13_31655554_-_AG::13:31655528-31655579(-)	3_49020700_-_AG::3:49020674-49020725(-)	97.436	39	1	0	6	44	13	51	1.77e-14	67.6
2_7285480_+_AG::2:7285454-7285505(+)	11_64891421_-_AG::11:64891395-64891446(-)	92.157	51	4	0	1	51	1	51	3.8e-16	73.1
2_7285486_+_AG::2:7285460-7285511(+)	11_64891419_-_AG::11:64891393-64891444(-)	93.617	47	3	0	1	47	5	51	1.37e-15	71.3
2_7285482_+_AG::2:7285456-7285507(+)	11_64891419_-_AG::11:64891393-64891444(-)	92.157	51	4	0	1	51	1	51	3.8e-16	73.1
11_60735119_+_AG::11:60735093-60735144(+)	13_91351074_+_AG::13:91351048-91351099(+)	100	45	0	0	6	50	7	51	1.75e-19	84.2
11_60735133_+_AG::11:60735107-60735158(+)	13_91351089_+_AG::13:91351063-91351114(+)	100	51	0	0	1	51	1	51	8.1e-23	95.3
12_36065295_+_AG::12:36065269-36065320(+)	17_59841284_+_AG::17:59841258-59841309(+)	100	51	0	0	1	51	1	51	8.1e-23	95.3
12_36065293_+_AG::12:36065267-36065318(+)	17_59841282_+_AG::17:59841256-59841307(+)	100	51	0	0	1	51	1	51	8.1e-23	95.3
12_36065285_+_AG::12:36065259-36065310(+)	17_59841274_+_AG::17:59841248-59841299(+)	100	51	0	0	1	51	1	51	8.1e-23	95.3
12_36065299_+_AG::12:36065273-36065324(+)	17_59841288_+_AG::17:59841262-59841313(+)	100	51	0	0	1	51	1	51	8.1e-23	95.3
15_120453432_+_AG::15:120453406-120453457(+)	2_218402669_+_AG::2:218402643-218402694(+)	100	51	0	0	1	51	1	51	8.1e-23	95.3
15_120453435_+_AG::15:120453409-120453460(+)	2_218402669_+_AG::2:218402643-218402694(+)	100	48	0	0	1	48	4	51	3.77e-21	89.8
15_120453424_+_AG::15:120453398-120453449(+)	2_218402660_+_AG::2:218402634-218402685(+)	100	46	0	0	5	50	6	51	4.88e-20	86.1
15_120453428_+_AG::15:120453402-120453453(+)	2_218402669_+_AG::2:218402643-218402694(+)	100	47	0	0	5	51	1	47	1.36e-20	87.9
2_65308350_+_AG::2:65308324-65308375(+)	19_13836462_-_AG::19:13836436-13836487(-)	97.674	43	1	0	5	47	3	45	1.06e-16	75
2_65308352_+_AG::2:65308326-65308377(+)	19_13836462_-_AG::19:13836436-13836487(-)	97.674	43	1	0	3	45	3	45	1.06e-16	75
2_65308360_+_AG::2:65308334-65308385(+)	19_13836454_-_AG::19:13836428-13836479(-)	97.297	37	1	0	1	37	1	37	2.28e-13	63.9
1_51412909_-_AG::1:51412883-51412934(-)	6_71403613_-_AG::6:71403587-71403638(-)	97.561	41	1	0	9	49	10	50	1.37e-15	71.3
1_51412908_-_AG::1:51412882-51412933(-)	6_71403613_-_AG::6:71403587-71403638(-)	97.561	41	1	0	8	48	10	50	1.37e-15	71.3
1_51412899_-_AG::1:51412873-51412924(-)	6_71403613_-_AG::6:71403587-71403638(-)	97.436	39	1	0	1	39	12	50	1.77e-14	67.6
1_51412910_-_AG::1:51412884-51412935(-)	6_71403613_-_AG::6:71403587-71403638(-)	97.561	41	1	0	10	50	10	50	1.37e-15	71.3
4_6948680_+_AG::4:6948654-6948705(+)	8_134804937_-_AG::8:134804911-134804962(-)	95.918	49	2	0	2	50	3	51	2.27e-18	80.5
4_6948681_+_AG::4:6948655-6948706(+)	8_134804937_-_AG::8:134804911-134804962(-)	95.918	49	2	0	1	49	3	51	2.27e-18	80.5
4_6948690_+_AG::4:6948664-6948715(+)	8_134804921_-_AG::8:134804895-134804946(-)	97.826	46	1	0	6	51	1	46	2.27e-18	80.5
4_6948679_+_AG::4:6948653-6948704(+)	8_134804937_-_AG::8:134804911-134804962(-)	95.918	49	2	0	3	51	3	51	2.27e-18	80.5
14_6520923_-_AG::14:6520897-6520948(-)	8_22244993_-_AG::8:22244967-22245018(-)	100	39	0	0	1	39	13	51	3.8e-16	73.1
2_78571475_+_AG::2:78571449-78571500(+)	5_180015369_-_AG::5:180015343-180015394(-)	100	51	0	0	1	51	1	51	8.1e-23	95.3
X_59602940_-_AG::X:59602914-59602965(-)	X_74287331_-_AG::X:74287305-74287356(-)	97.561	41	1	0	11	51	1	41	1.37e-15	71.3
X_59602938_-_AG::X:59602912-59602963(-)	X_74287331_-_AG::X:74287305-74287356(-)	97.674	43	1	0	9	51	1	43	1.06e-16	75
X_59602930_-_AG::X:59602904-59602955(-)	X_74287331_-_AG::X:74287305-74287356(-)	97.917	48	1	0	1	48	1	48	1.75e-19	84.2
13_31655058_-_AG::13:31655032-31655083(-)	3_49020212_-_AG::3:49020186-49020237(-)	97.826	46	1	0	6	51	1	46	2.27e-18	80.5
13_31655056_-_AG::13:31655030-31655081(-)	3_49020212_-_AG::3:49020186-49020237(-)	97.917	48	1	0	4	51	1	48	1.75e-19	84.2
13_31655061_-_AG::13:31655035-31655086(-)	3_49020212_-_AG::3:49020186-49020237(-)	97.674	43	1	0	9	51	1	43	1.06e-16	75
12_45088857_-_AG::12:45088831-45088882(-)	17_28861416_-_AG::17:28861390-28861441(-)	91.111	45	4	0	7	51	1	45	8.22e-13	62.1
1_254824227_+_AG::1:254824201-254824252(+)	9_114209465_+_AG::9:114209439-114209490(+)	100	51	0	0	1	51	1	51	8.1e-23	95.3
12_52422400_-_AG::12:52422374-52422425(-)	17_7017998_-_AG::17:7017972-7018023(-)	98.039	51	1	0	1	51	1	51	3.77e-21	89.8
12_52422397_-_AG::12:52422371-52422422(-)	17_7017998_-_AG::17:7017972-7018023(-)	97.917	48	1	0	1	48	4	51	1.75e-19	84.2
X_46302455_-_AG::X:46302429-46302480(-)	X_53556310_-_AG::X:53556284-53556335(-)	97.674	43	1	0	9	51	1	43	1.06e-16	75
13_181302494_+_AG::13:181302468-181302519(+)	21_16539102_+_AG::21:16539076-16539127(+)	97.826	46	1	0	6	51	5	50	2.27e-18	80.5
13_181302495_+_AG::13:181302469-181302520(+)	21_16539102_+_AG::21:16539076-16539127(+)	97.872	47	1	0	5	51	5	51	6.31e-19	82.4
13_181302503_+_AG::13:181302477-181302528(+)	21_16539102_+_AG::21:16539076-16539127(+)	100	43	0	0	1	43	9	51	2.27e-18	80.5
13_181302501_+_AG::13:181302475-181302526(+)	21_16539102_+_AG::21:16539076-16539127(+)	100	43	0	0	3	45	9	51	2.27e-18	80.5
6_58332273_-_AG::6:58332247-58332298(-)	19_51692619_+_AG::19:51692593-51692644(+)	98.039	51	1	0	1	51	1	51	3.77e-21	89.8
6_58332264_-_AG::6:58332238-58332289(-)	19_51692619_+_AG::19:51692593-51692644(+)	100	42	0	0	1	42	10	51	8.16e-18	78.7
